# Supplementary material for: Branched Chondroitin Sulfate Oligosaccharides Derived from the Sea Cucumber Acaudina molpadioides Stimulate Neurite Outgrowth
Source: MDPI journal article supplement (doi:10.3390/md20100653), 2022-10-21
Supplement: s1 [file s1]

## *Supporting Information*

# **Branched Chondroitin Sulfate Oligosaccharides Derived from the Sea Cucumber *Acaudina molpadioides* Stimulate Neurite Outgrowth**

**Weili Wang<sup>1,2,†</sup>, Hui Mao<sup>1,2,†</sup>, Sujuan Li<sup>1,2</sup>, Longlong Zhang<sup>3</sup>, Lian Yang<sup>1</sup>, Ronghua Yin<sup>1,4,\*</sup>  
and Jinhua Zhao<sup>1,4,\*</sup>**

<sup>1</sup> State Key Laboratory of Phytochemistry and Plant Resources in West China, Kunming Institute of Botany, Chinese Academy of Sciences, Kunming 650201, China;

<sup>2</sup> University of Chinese Academy of Sciences, Beijing 100049, China

<sup>3</sup> State Key Laboratory for Conservation and Utilization of Bio-Resources, Key Laboratory for Microbial Resources of the Ministry of Education, School of life Sciences, Yunnan University, Kunming 650091, China;

<sup>4</sup> School of Pharmaceutical Sciences, South-Central Minzu University, Wuhan 430074, China

\* Correspondence: yinrh77@163.com (R.Y.); zhaojhscu@163.com (J.Z.)

† These authors contributed equally to this work.

## **Table of contents**

**Figure S1.** <sup>1</sup>H/<sup>13</sup>C NMR spectra of oligosaccharide **9**.

**Figures S2-4.** HSQC spectrum and signal assignments of oligosaccharide **10–12**.

**Figure S5.** MS spectra and signal assignments of oligosaccharides **8–13**.

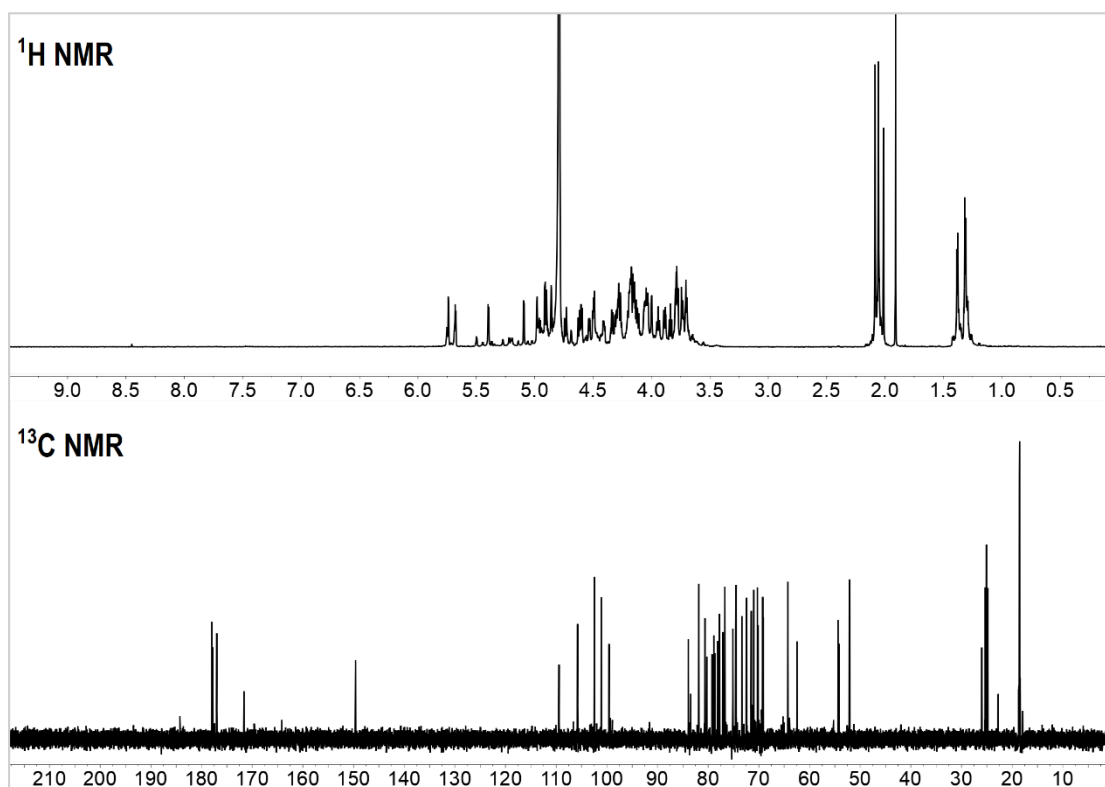

**Figure S1.**  $^1\text{H}/^{13}\text{C}$  NMR spectra of oligosaccharide 9.

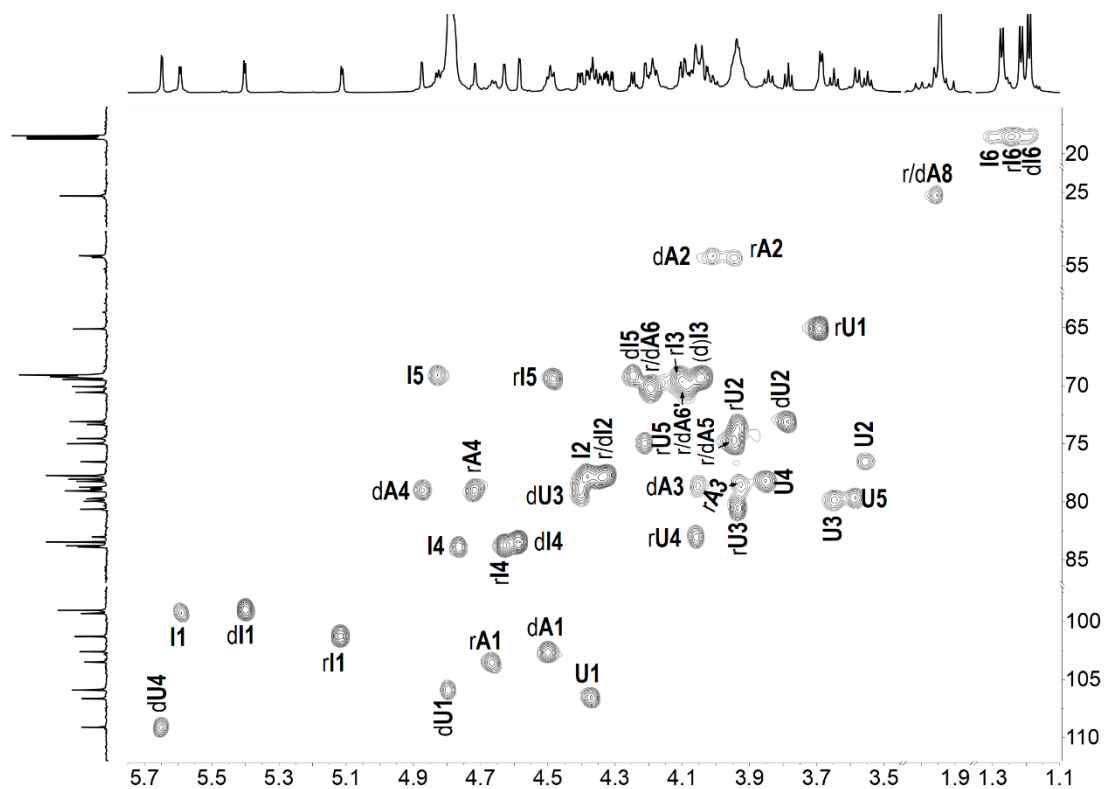

**Figure S2.** HSQC spectrum and signal assignments of oligosaccharide 10.

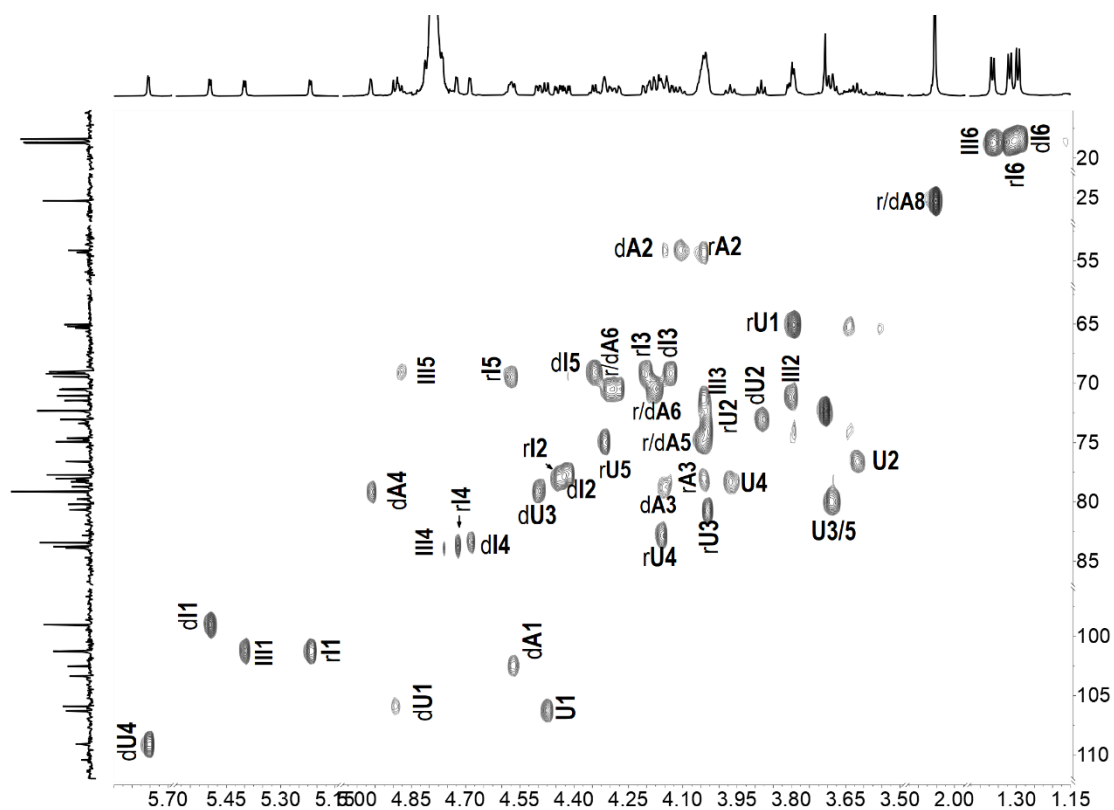

**Figure S3.** HSQC spectrum and signal assignments of oligosaccharide **11**.

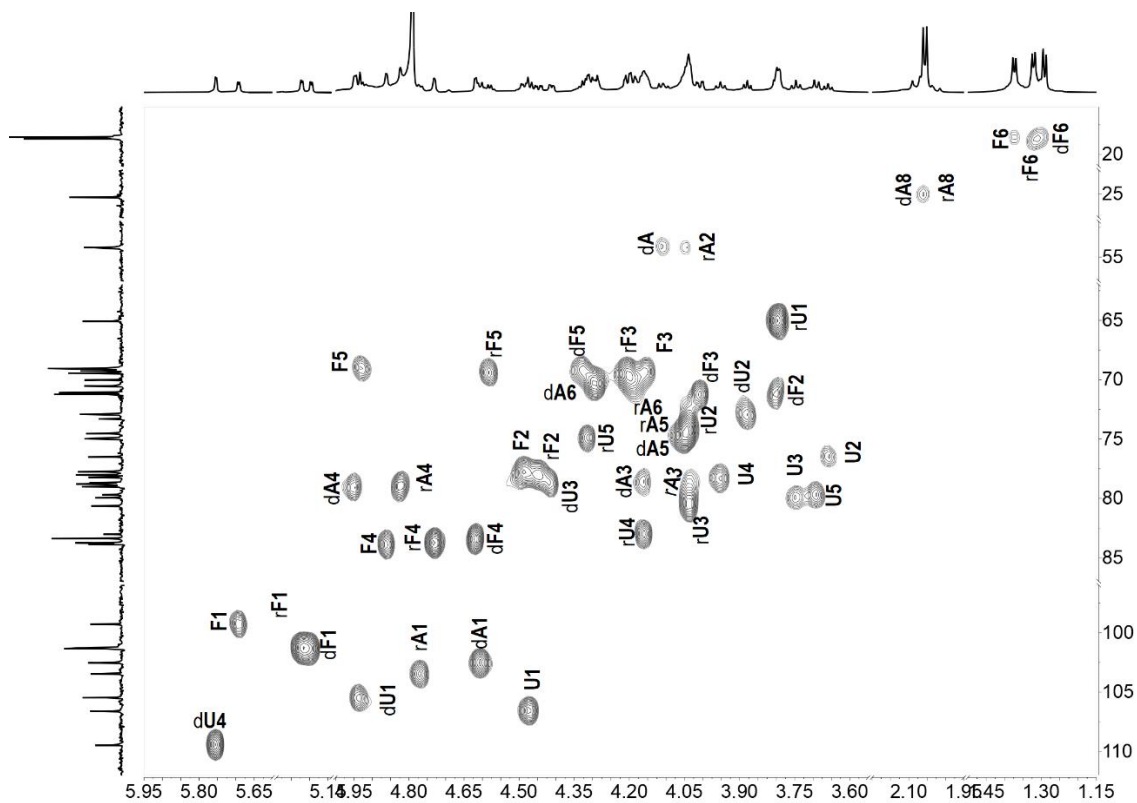

**Figure S4.** HSQC spectrum and signal assignments of oligosaccharide **12**.

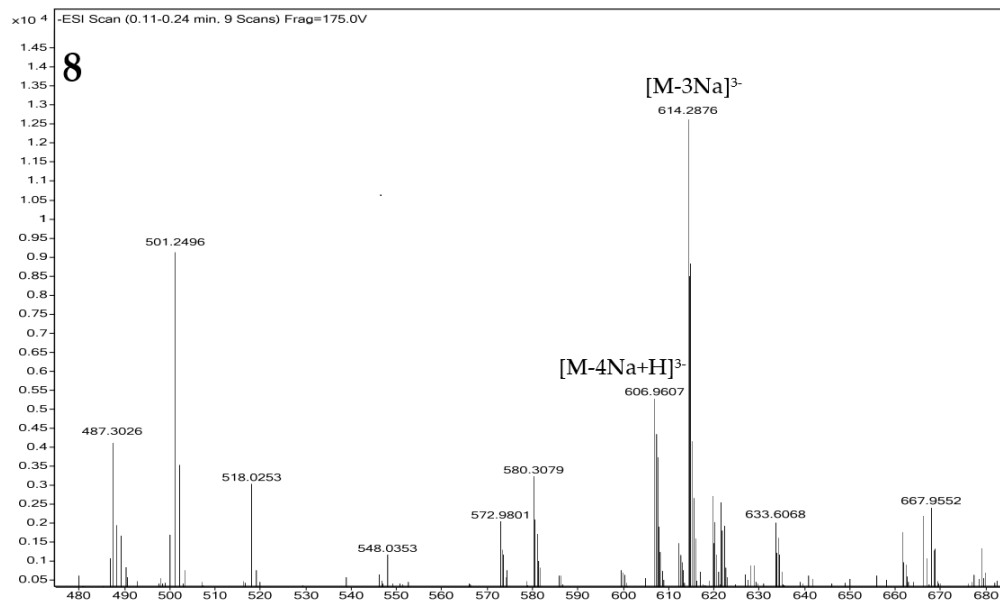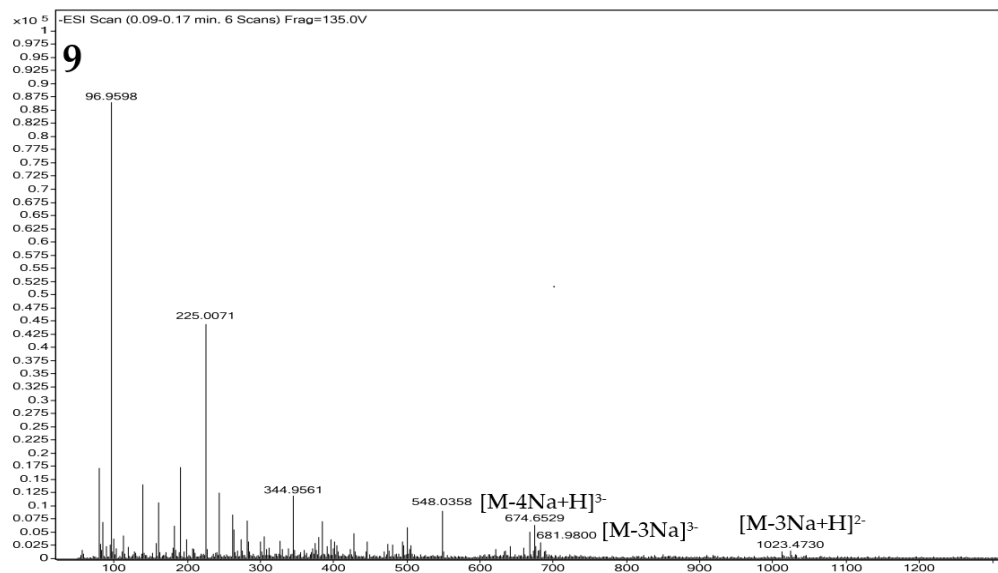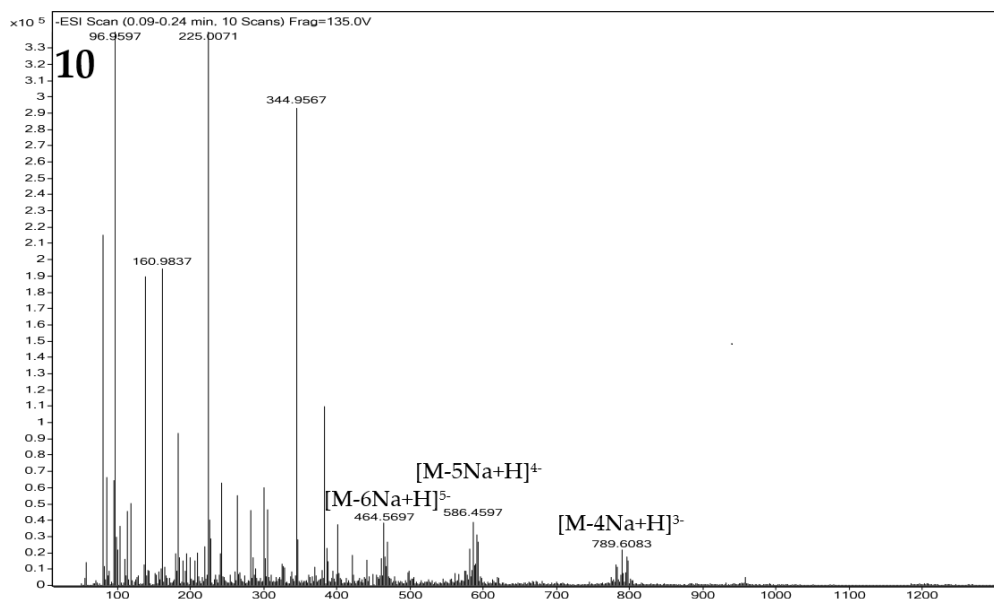

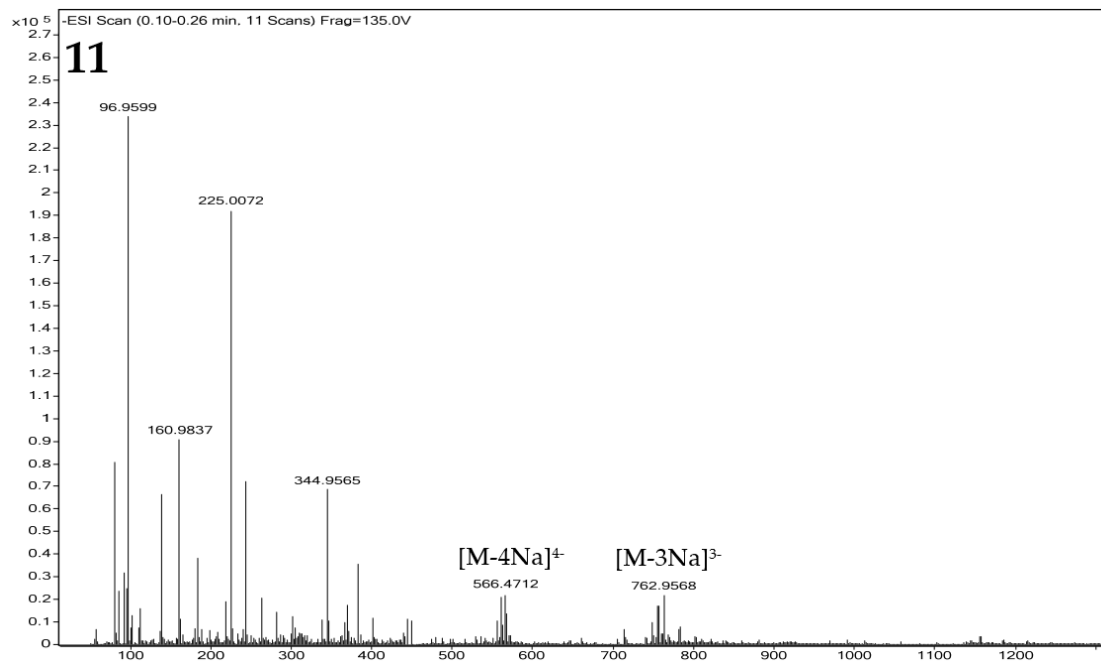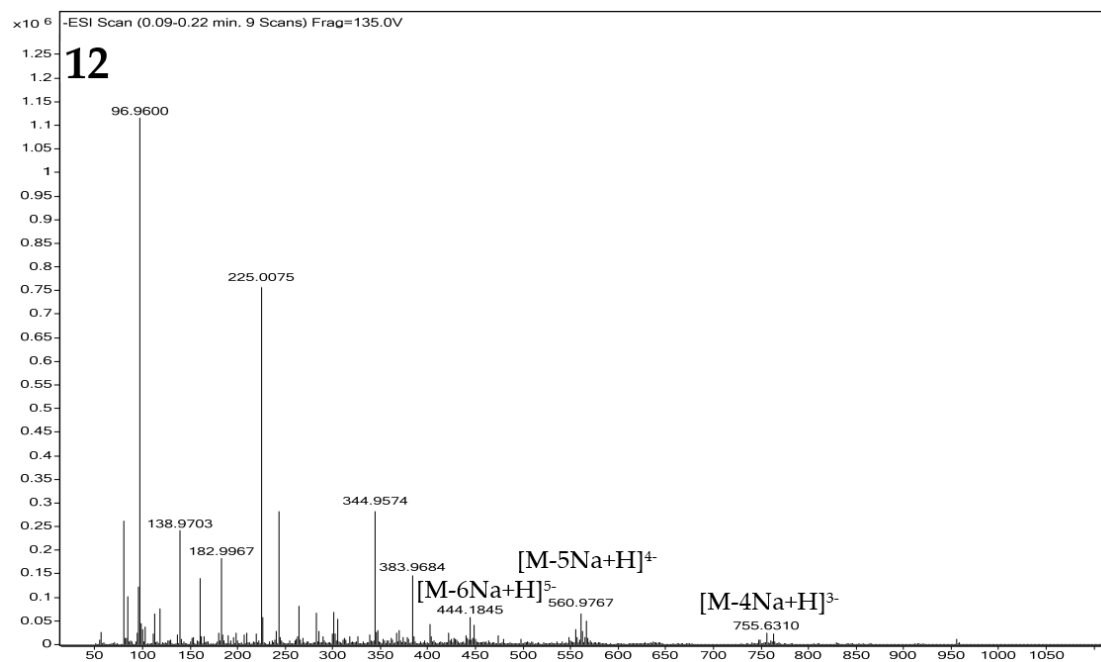

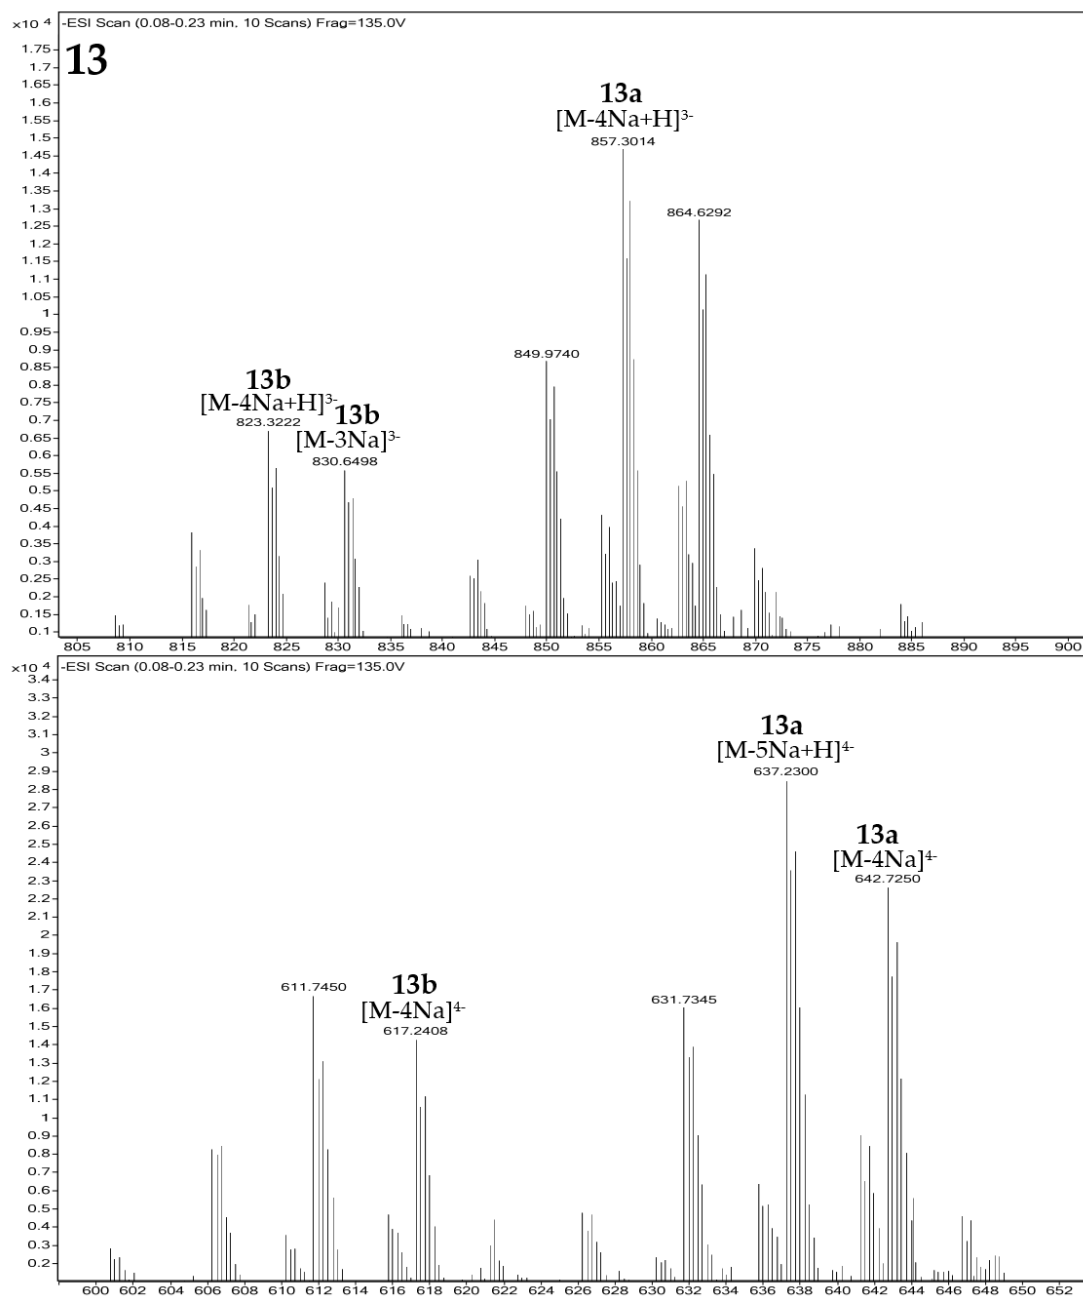

**Figure S5.** MS spectra and signal assignments of oligosaccharides 8–13.
